# Supplementary material for: Fusarium sacchari hypovirus 1, a Member of Hypoviridae with Virulence Attenuation Capacity in Phytopathogenic Fusarium Species
Source: MDPI journal article supplement (doi:10.3390/v16040608), 2024-04-15
Supplement: s1 [file s1]

**Supplementary Table S1. The *Fusarium*-infecting mycoviruses.**

| <b>No.</b> | <b>Genus</b>            | <b>Genome type</b> | <b>Mycovirus</b>                                     | <b>Accession no.</b>                                                                              |
|------------|-------------------------|--------------------|------------------------------------------------------|---------------------------------------------------------------------------------------------------|
| <b>1</b>   | <i>Chrysoviridae</i>    | dsRNA              | Fusarium graminearum mycovirus China 9(FgV-China 9)  | dsRNA1:HQ282213;<br>dsRNA2:HQ2228214;<br>dsRNA3:HQ282215;<br>dsRNA4:HQ2228216;<br>dsRNA5:HQ282217 |
| <b>2</b>   | <i>Chrysoviridae</i>    | dsRNA              | Fusarium graminearum dsRNA mycovirus 2(FgV2)         | dsRNA1:HQ343295;<br>dsRNA2:HQ343296;<br>dsRNA3:HQ3343297;<br>dsRNA4:HQ343298;                     |
| <b>3</b>   | <i>Chrysoviridae</i>    | dsRNA              | Fusarium oxysporum f. sp. dianthi mycovirus 1(FodV)  | dsRNA1:KP876629;<br>dsRNA2:KP876630;<br>dsRNA3:KP876631;<br>dsRNA4:KP876632                       |
| <b>4</b>   | <i>Chrysoviridae</i>    | dsRNA              | Fusarium sacchari chrysovirus 1(FsCV1)               | dsRNA1: MN295964;<br>dsRNA2: MN295965;<br>dsRNA3: MN295966;<br>dsRNA4: MN295967                   |
| <b>5</b>   | <i>Chrysoviridae</i>    | dsRNA              | Fusarium oxysporum chrysovirus 1(FoCV1)              | dsRNA1:EF152346;<br>dsRNA2:EF152347;<br>dsRNA3:EF152348                                           |
| <b>6</b>   | <i>Megabirnaviridae</i> | dsRNA              | Fusarium pseudograminearum megabirnavirus 1(FpgMBV1) | RNA1: MH057692<br>RNA2: MH057693                                                                  |
| <b>7</b>   | <i>Partitiviridae</i>   | dsRNA              | Fusarium solani virus 1(FsV1)                        | RNA1: NC_003885                                                                                   |

|           |                        |                    |                                                           |                                                                                                                                      |
|-----------|------------------------|--------------------|-----------------------------------------------------------|--------------------------------------------------------------------------------------------------------------------------------------|
|           |                        |                    |                                                           | RNA2: NC_003886                                                                                                                      |
| <b>8</b>  | <i>Partitiviridae</i>  | dsRNA              | Fusarium poae virus 1(FpV1)                               | RNA1: NC_003883<br>RNA2: NC_003884                                                                                                   |
| <b>9</b>  | <i>Partitiviridae</i>  | dsRNA              | Fusarium solani partitivirus 2(FsPV2)                     | LC006130                                                                                                                             |
| <b>10</b> | <i>Partitiviridae</i>  | dsRNA              | Fusarium oxysporum f. sp. Cubense partitivirus 1 (FocPV1) | OQ685981                                                                                                                             |
| <b>11</b> | <i>Partitiviridae</i>  | dsRNA              | Fusarium oxysporum f. sp. cubense partitivirus 2 (FocPV2) | OQ685986                                                                                                                             |
| <b>12</b> | <i>Partitiviridae</i>  | dsRNA              | Fusarium oxysporum f. sp. cubense partitivirus 3 (FocPV3) | OQ685982                                                                                                                             |
| <b>13</b> | <i>Partitiviridae</i>  | dsRNA              | Fusarium oxysporum f. sp. cubense partitivirus 4 (FocPV4) | OQ685980                                                                                                                             |
| <b>14</b> | <i>Partitiviridae</i>  | dsRNA              | Fusarium oxysporum f. sp. cubense partitivirus 5 (FocPV5) | OQ685983                                                                                                                             |
| <b>15</b> | <i>Partitiviridae</i>  | dsRNA              | Fusarium oxysporum f. sp. cubense partitivirus 6 (FocPV6) | OQ685984                                                                                                                             |
| <b>16</b> | <i>Partitiviridae</i>  | dsRNA              | Fusarium oxysporum f. sp. cubense partitivirus 7 (FocPV7) | OQ685985                                                                                                                             |
| <b>17</b> | <i>Partitiviridae</i>  | dsRNA              | Fusarium mangiferae partitivirus 1 (FmPV1)                | segment 1:MZ493897<br>segment 2:MZ493898                                                                                             |
| <b>18</b> | <i>Partitiviridae</i>  | dsRNA              | Fusarium mangiferae partitivirus 2 (FmPV2)                | segment 1:MZ493899<br>segment 2:MZ493800                                                                                             |
| <b>19</b> | <i>Polymycoviridae</i> | dsRNA and<br>ssRNA | Fusarium redolens polymycovirus 1(FrPmV1)                 | RNA1:MK609920<br>RNA2:MK609921<br>RNA3:MK609922<br>RNA4:MK609923<br>RNA5:MK609924<br>RNA6:MK609925<br>RNA7:MK609926<br>RNA8:MK609927 |
| <b>20</b> | <i>Totiviridae</i>     | dsRNA              | Fusarium asiaticum victorivirus 1(FaVV1)                  | MH615042                                                                                                                             |
| <b>21</b> | <i>Alternaviridae</i>  | dsRNA              | Fusarium graminearum alternavirus 1(FgAV1)                | MG254901                                                                                                                             |
| <b>22</b> | <i>Alternaviridae</i>  | dsRNA              | Fusarium incarnatum alternavirus 1(FiAV1)                 | MH899114                                                                                                                             |

|           |                          |         |                                                                 |                                    |
|-----------|--------------------------|---------|-----------------------------------------------------------------|------------------------------------|
| <b>23</b> | <i>Fusagraviridae</i>    | dsRNA   | Fusarium poae dsRNA virus 2(FpV2)                               | KU728180                           |
| <b>24</b> | <i>Fusagraviridae</i>    | dsRNA   | Fusarium poae dsRNA virus 3(FpV3)                               | KU728181                           |
| <b>25</b> | <i>Fusagraviridae</i>    | dsRNA   | Fusarium virguliforme dsRNA mycovirus 1(FvV1)                   | JN671444                           |
| <b>26</b> | <i>Fusagraviridae</i>    | dsRNA   | Fusarium virguliforme dsRNA mycovirus 2(FvV2)                   | JN671443                           |
| <b>27</b> | <i>Fusagraviridae</i>    | dsRNA   | Fusarium graminearum dsRNA mycovirus-3(FgV3)                    | NC_013469                          |
| <b>28</b> | <i>Curvulaviridae</i>    | dsRNA   | Fusarium graminearum dsRNA mycovirus-4(FgV4)                    | RNA1: NC_013470<br>RNA2: NC_013471 |
| <b>29</b> | <i>Curvulaviridae</i>    | dsRNA   | Fusarium graminearum dsRNA mycovirus-5(FgV5)                    | RNA1: KX380787<br>RNA2: KX380788   |
| <b>30</b> | <i>Deltaflexiviridae</i> | + ssRNA | Fusarium graminearum deltaflexivirus 1(FgDFV1)                  | KX015962                           |
| <b>31</b> | <i>Endornaviridae</i>    | + ssRNA | Fusarium oxysporum f. sp. cubense endornavirus 1 (FocEV1)       | OQ685975                           |
| <b>32</b> | <i>Botourmiaviridae</i>  | +ssRNA  | Fusarium oxysporum f. sp. cubense ourmia-like virus 1 (FocOLV1) | OQ685967                           |
| <b>33</b> | <i>Botourmiaviridae</i>  | +ssRNA  | Fusarium oxysporum f. sp. cubense ourmia-like virus 2 (FocOLV2) | OQ685968                           |
| <b>34</b> | <i>Botourmiaviridae</i>  | +ssRNA  | Fusarium oxysporum f. sp. cubense ourmia-like virus 3 (FocOLV3) | OQ685970                           |
| <b>35</b> | <i>Botourmiaviridae</i>  | +ssRNA  | Fusarium oxysporum f. sp. cubense ourmia-like virus 4 (FocOLV4) | OQ685969                           |
| <b>36</b> | <i>Botourmiaviridae</i>  | +ssRNA  | Fusarium asiaticum ourmiavirus 2(FaOV2)                         | RNA1:MZ969060<br>RNA1:MZ969061     |
| <b>37</b> | <i>Botourmiaviridae</i>  | +ssRNA  | Fusarium asiaticum ourmiavirus 1(FaOV1)                         | MZ969063                           |
| <b>38</b> | <i>Botourmiaviridae</i>  | +ssRNA  | Fusarium mangiferae botourmiavirus 1(FmBOV1)                    | MZ493907                           |
| <b>39</b> | <i>Botourmiaviridae</i>  | +ssRNA  | Fusarium mangiferae botourmiavirus 2(FmBOV2)                    | MZ493908                           |
| <b>40</b> | <i>Botourmiaviridae</i>  | +ssRNA  | Fusarium mangiferae botourmiavirus 3(FmBOV3)                    | MZ493909                           |

|    |                     |         |                                                        |           |
|----|---------------------|---------|--------------------------------------------------------|-----------|
| 41 | <i>Hypoviridae</i>  | + ssRNA | Fusarium graminearum hypovirus 1(FgHV1)                | KC330231  |
| 42 | <i>Hypoviridae</i>  | + ssRNA | Fusarium graminearum hypovirus 2(FgHV2)                | KP208178  |
| 43 | <i>Hypoviridae</i>  | + ssRNA | Fusarium langsethiae hypovirus 1(FIHV1)                | KY120321  |
| 44 | <i>Hypoviridae</i>  | + ssRNA | Fusarium sacchari hypovirus 1(FsHV1)                   | MN295969  |
| 45 | <i>Hypoviridae</i>  | + ssRNA | Fusarium sambucinum hypovirus 1 (FsamHV1)              | NC_076613 |
| 46 | <i>Narnaviridae</i> | + ssRNA | Fusarium circinatum mitovirus 1(FcMV1)                 | KF803546  |
| 47 | <i>Narnaviridae</i> | + ssRNA | Fusarium globosum mitovirus 1(FgMV1)                   | LC006128  |
| 48 | <i>Narnaviridae</i> | + ssRNA | Fusarium boothii mitovirus 1(FbMV1)                    | LC425112  |
| 49 | <i>Narnaviridae</i> | + ssRNA | Fusarium andiyazi mitovirus 1(FaMV1)                   | MN295972  |
| 50 | <i>Narnaviridae</i> | + ssRNA | Fusarium andiyazi mitovirus 2(FaMV2)                   | MN295975  |
| 51 | <i>Narnaviridae</i> | + ssRNA | Fusarium sacchari mitovirus 1(FsMV1)                   | MN295976  |
| 52 | <i>Narnaviridae</i> | + ssRNA | Fusarium poae narnavirus 1(FpNV1)                      | NC_030865 |
| 53 | <i>Narnaviridae</i> | + ssRNA | Fusarium asiaticum narnavirus 1                        | MZ969062  |
| 54 | <i>Mitoviridae</i>  | + ssRNA | Fusarium coeruleum mitovirus 1(FocMV1)                 | LC006129  |
| 55 | <i>Mitoviridae</i>  | + ssRNA | Fusarium oxysporum f. sp. cubense mitovirus 1 (FocMV1) | OQ685973  |
| 56 | <i>Mitoviridae</i>  | + ssRNA | Fusarium oxysporum f. sp. cubense mitovirus 2 (FocMV2) | OQ685971  |
| 57 | <i>Mitoviridae</i>  | + ssRNA | Fusarium oxysporum f. sp. cubense mitovirus 3 (FocMV3) | OQ685974  |
| 58 | <i>Mitoviridae</i>  | + ssRNA | Fusarium oxysporum f. sp. cubense mitovirus 4 (FocMV4) | OQ685972  |
| 59 | <i>Mitoviridae</i>  | + ssRNA | Fusarium asiaticum mitovirus 1                         | MZ969051  |
| 60 | <i>Mitoviridae</i>  | + ssRNA | Fusarium asiaticum mitovirus 2                         | MZ969052  |
| 61 | <i>Mitoviridae</i>  | + ssRNA | Fusarium asiaticum mitovirus 3                         | MZ969053  |
| 62 | <i>Mitoviridae</i>  | + ssRNA | Fusarium asiaticum mitovirus 4                         | MZ969054  |
| 63 | <i>Mitoviridae</i>  | + ssRNA | Fusarium asiaticum mitovirus 5                         | MZ969055  |
| 64 | <i>Mitoviridae</i>  | + ssRNA | Fusarium asiaticum mitovirus 6                         | MZ969056  |
| 65 | <i>Mitoviridae</i>  | + ssRNA | Fusarium asiaticum mitovirus 7                         | MZ969057  |

|           |                      |         |                                              |                                                                                                                                                                                                                                                              |
|-----------|----------------------|---------|----------------------------------------------|--------------------------------------------------------------------------------------------------------------------------------------------------------------------------------------------------------------------------------------------------------------|
| <b>66</b> | <i>Mitoviridae</i>   | + ssRNA | Fusarium asiaticum mitovirus 8               | MZ969058                                                                                                                                                                                                                                                     |
| <b>67</b> | <i>Mitoviridae</i>   | + ssRNA | Fusarium poae mitovirus 1                    | MZ969059                                                                                                                                                                                                                                                     |
| <b>68</b> | <i>Mitoviridae</i>   | + ssRNA | Fusarium mangiferae mitovirus 1 (FmMV1)      | MZ493901                                                                                                                                                                                                                                                     |
| <b>69</b> | <i>Mitoviridae</i>   | + ssRNA | Fusarium mangiferae mitovirus 2 (FmMV2)      | MZ493902                                                                                                                                                                                                                                                     |
| <b>70</b> | <i>Mitoviridae</i>   | + ssRNA | Fusarium mangiferae mitovirus 3 (FmMV3)      | MZ493903                                                                                                                                                                                                                                                     |
| <b>71</b> | <i>Mitoviridae</i>   | + ssRNA | Fusarium mangiferae mitovirus 4 (FmMV4)      | MZ493904                                                                                                                                                                                                                                                     |
| <b>72</b> | <i>Mitoviridae</i>   | + ssRNA | Fusarium mangiferae mitovirus 5 (FmMV5)      | MZ493905                                                                                                                                                                                                                                                     |
| <b>73</b> | <i>Mitoviridae</i>   | + ssRNA | Fusarium mangiferae mitovirus 6 (FmMV6)      | MZ493906                                                                                                                                                                                                                                                     |
| <b>74</b> | <i>Mitoviridae</i>   | + ssRNA | Fusarium verticillioides mitovirus 1 (FvMV1) | NC_076900                                                                                                                                                                                                                                                    |
| <b>75</b> | <i>Mitoviridae</i>   | + ssRNA | Fusarium andiyazi mitovirus 1 (FaMV1-162)    | NC_076901                                                                                                                                                                                                                                                    |
| <b>76</b> | <i>Fusariviridae</i> | + ssRNA | Fusarium asiaticum fusarivirus 1             | MZ969065                                                                                                                                                                                                                                                     |
| <b>77</b> | <i>Fusariviridae</i> | + ssRNA | Fusarium graminearum dsRNA mycovirus-1(FgV1) | NC_006937                                                                                                                                                                                                                                                    |
| <b>78</b> | <i>Fusariviridae</i> | + ssRNA | Fusarium poae fusarivirus 2                  | OK524195                                                                                                                                                                                                                                                     |
| <b>79</b> | <i>Fusariviridae</i> | + ssRNA | Fusarium pseudograminearum fusarivirus 1     | OP100308                                                                                                                                                                                                                                                     |
| <b>80</b> | <i>Tymoviridae</i>   | + ssRNA | Fusarium graminearum mycotymovirus 1(FgMTV1) | KT360947                                                                                                                                                                                                                                                     |
| <b>81</b> | <i>Hadakaviridae</i> | + ssRNA | Hadaka virus 1 (HadV1)                       | segment 1: LC519840<br>segment 2: LC519841<br>segment 3: LC519842<br>segment 4: LC519843<br>segment 5: LC519844<br>segment 6: LC519845<br>segment 7: LC519846<br>Segment t8: LC519847<br>segment 9: LC519848<br>segment 10: LC519849<br>segment 11: LC519850 |

|           |                      |         |                                                                            |                                                                |
|-----------|----------------------|---------|----------------------------------------------------------------------------|----------------------------------------------------------------|
| <b>82</b> | <i>Mymonaviridae</i> | - ssRNA | Fusarium graminearum negative-stranded RNA virus 1(FgNSRV-1)               | MF276904                                                       |
| <b>83</b> | <i>Mymonaviridae</i> | -ssRNA  | Fusarium oxysporum f. sp. cubense mymonavirus 1 (FocMyV1)                  | OQ685977                                                       |
| <b>84</b> | <i>Mymonaviridae</i> | -ssRNA  | Fusarium oxysporum f. sp. cubense negative-stranded RNA virus 1 (FocNSRV1) | OQ685978                                                       |
| <b>85</b> | <i>Phenuiviridae</i> | -ssRNA  | Fusarium sibiricum coguvirus 1(FsCV1)                                      | OQ295988                                                       |
| <b>86</b> | <i>Phenuiviridae</i> | -ssRNA  | Fusarium asiaticum mycobunyavirus 1 (FaMBV1)                               | segment L:MZ969068<br>segment M:MZ969069<br>segment S:MZ969070 |
| <b>87</b> | unassigned           | + ssRNA | Fusarium oxysporum f. sp. cubense alphavirus-like virus (FocALV)           | OQ685976                                                       |
| <b>88</b> | unassigned           | -ssRNA  | Fusarium oxysporum f. sp. cubense negative-stranded RNA virus 2 (FocNSRV2) | OQ685979                                                       |
| <b>89</b> | unassigned           | + ssRNA | Fusarium boothii large flexivirus 1(FbLFV1)                                | LC425115                                                       |
| <b>90</b> | unassigned           | + ssRNA | Fusarium sacchari alphavirus-like virus 1(FsALV1)                          | MN295968                                                       |
| <b>91</b> | unassigned           | -ssRNA  | Fusarium asiaticum negative-stranded RNA virus 1(FaNSRV1)                  | MZ969066                                                       |
| <b>92</b> | unassigned           | -ssRNA  | Fusarium poae negative-stranded virus 1                                    | LC150618                                                       |
| <b>93</b> | unassigned           | -ssRNA  | Fusarium poae negative-stranded virus 2                                    | LC150619                                                       |

**Supplementary Table S2.** The family Hypoviridae includes eight genera and 55 species.

| Genus          | No. | Virus protein for alignment                | NCIB Accession number | Year |
|----------------|-----|--------------------------------------------|-----------------------|------|
| Alphahypovirus | 1   | Fusarium sacchari hypovirus 1 isolate LZ1  | this study            | 2024 |
|                |     | Fusarium sacchari hypovirus 1 isolate LZ8  | this study            | 2024 |
|                |     | Fusarium sacchari hypovirus 1 isolate LZ14 | this study            | 2024 |
|                |     | Fusarium sacchari hypovirus 1 isolate FS18 | this study            | 2024 |
|                |     | Fusarium sacchari hypovirus 1 isolate LZ12 | this study            | 2024 |
|                |     | Fusarium sacchari hypovirus 1 isolate FSA1 | this study            | 2024 |
|                |     | Fusarium sacchari hypovirus 1 isolate FS3  | this study            | 2024 |
|                |     | Fusarium sacchari hypovirus 1 isolate FS66 | this study            | 2024 |
|                |     | Fusarium sacchari hypovirus 1 isolate FS65 | this study            | 2024 |
|                |     | Fusarium sacchari hypovirus 1 strain FZ06  | MN295969              | 2020 |
|                |     | Fusarium sacchari hypovirus 1 isolate FS1  | this study            | 2024 |
|                |     | Fusarium sacchari hypovirus 1 isolate FS9  | this study            | 2024 |
|                | 2   | Wuhan insect virus 14                      | KX883007              | 2017 |
|                | 3   | Trichoderma asperellum hypovirus 1         | MK279475              | 2019 |
|                | 4   | Alternaria alternata hypovirus 1           | MK189193              | 2019 |
|                | 5   | Fusarium graminearum hypovirus 1           | MK279472              | 2019 |
|                | 6   | Fusarium sambucinum hypovirus 1            | LC596823              | 2022 |
|                | 7   | Bipolaris oryzae hypovirus 1               | MH316122              | 2019 |
|                | 8   | Cryphonectria hypovirus 1                  | M57938                | 1995 |
|                | 9   | Cryphonectria hypovirus 2                  | L29010                | 1994 |
|                | 10  | Botrytis cinerea hypovirus 2               | MN617169              | 2021 |
|                | 11  | Macrophomina phaseolina hypovirus 1        | KP900893              | 2016 |

|                         |    |                                        |                   |      |
|-------------------------|----|----------------------------------------|-------------------|------|
|                         | 12 | Macrophomina phaseolina hypovirus 2    | MT062425          | 2020 |
|                         | 13 | Pestalotiopsis fici hypovirus 1        | OP441373-OP441375 | 2022 |
|                         | 14 | Trichoderma harzianum hypovirus 2      | MW863664          | 2021 |
|                         | 15 | Cercospora beticola hypovirus 1        | MZ546195          | 2022 |
| <b>Zetahypovirus</b>    | 16 | Sclerotinia sclerotiorum hypovirus 6   | MH766501          | 2018 |
| <b>Deltahypovirus</b>   | 17 | Beihai_hypolike_virus_1                | KX883006          | 2017 |
|                         | 18 | Beihai_sipunculid_worm_virus_6         | KX883005          | 2017 |
| <b>Epsilonhypovirus</b> | 19 | Agaricus bisporus virus 2              | KY357507          | 2017 |
|                         | 20 | Entoleuca hypovirus 1                  | MF375885          | 2018 |
|                         | 21 | Rosellinia necatrix hypovirus 2        | LC333733          | 2018 |
|                         | 22 | Sclerotinia homoeocarpa hypovirus 1    | MK279473          | 2023 |
|                         | 23 | Rosellinia necatrix hypovirus 1        | LC318482          | 2018 |
|                         | 24 | Fusarium graminearum hypovirus 2       | KP208178          | 2015 |
|                         | 25 | Fusarium langsethiae hypovirus 1       | KY120321          | 2016 |
|                         | 26 | Fusarium poae hypovirus 1              | LC150612          | 2018 |
| <b>Betahypovirus</b>    | 27 | Trichoderma harzianum hypovirus 1      | MN172262          | 2019 |
|                         | 28 | Cryphonectria hypovirus 4              | AY307099          | 2019 |
|                         | 29 | Setosphaeria turcica hypovirus 1       | MK279474          | 2019 |
|                         | 30 | Fusarium oxysporum dianthi hypovirus 2 | MN176979          | 2020 |
|                         | 31 | Valsa ceratosperma hypovirus 1         | AB690372          | 2012 |
|                         | 32 | Phomopsis longicolla hypovirus         | KF537784          | 2014 |
|                         | 33 | Cryphonectria hypovirus 3              | AF188515          | 2000 |
|                         | 34 | Botrytis cinerea hypovirus 1           | MG554632          | 2018 |
|                         | 35 | Botrytis cinerea hypovirus 3           | MN617170          | 2021 |



|                       |    |                                                       |          |      |
|-----------------------|----|-------------------------------------------------------|----------|------|
|                       | 36 | Sclerotinia sclerotiorum hypovirus 1                  | JF781304 | 2011 |
|                       | 37 | Sclerotinia sclerotiorum hypovirus 1-A                | MF444220 | 2018 |
|                       | 38 | Botryosphaeria dothidea hypovirus 1<br>(BdHV1/SXD111) | OR387868 | 2023 |
|                       | 39 | Colletotrichum camelliae hypovirus 1                  | OR077707 | 2023 |
| <b>Thetahypovirus</b> | 40 | Botrytis cinerea hypovirus 5                          | MT157414 | 2021 |
|                       | 41 | Sclerotinia sclerotiorum hypovirus 2                  | MH347276 | 2019 |
|                       | 42 | Sclerotium rolfsii hypovirus 1                        | MH037014 | 2018 |
|                       | 43 | Botrytis cinerea hypovirus 4                          | MN617171 | 2022 |
|                       | 44 | Rhizoctonia solani hypovirus 1                        | MK558259 | 2019 |
| <b>Gammahypovirus</b> | 45 | Sclerotium rolfsii hypovirus 7                        | MH766502 | 2018 |
|                       | 46 | Sclerotium rolfsii hypovirus 5                        | MH766500 | 2018 |
|                       | 47 | Sclerotium rolfsii hypovirus 4                        | MH766499 | 2018 |
|                       | 48 | Sclerotium rolfsii hypovirus 2                        | MH766497 | 2018 |
|                       | 49 | Sclerotium rolfsii hypovirus 3                        | MH766498 | 2018 |
| <b>Etahypovirus</b>   | 50 | Sclerotium rolfsii hypovirus 8                        | MH766503 | 2018 |
| <b>unassigned</b>     | 51 | Rhizoctonia zeae hypovirus 1                          | OQ559666 | 2023 |
|                       | 52 | Rhizoctonia zeae hypovirus 2                          | OQ559672 | 2023 |
|                       | 53 | Alternaria dianthicola hypovirus 1                    | ON843755 | 2022 |
|                       | 54 | Sclerotinia sclerotiorum hypovirus 9                  | MW454884 | 2021 |
|                       | 55 | Erysiphe necator associated hypovirus 2               | MN558694 | 2021 |

**Supplementary Table S3.** Primers used in this study.

| Primers for amplifying the full length of FsHV1 |               |                                 |                     |
|-------------------------------------------------|---------------|---------------------------------|---------------------|
|                                                 | Primer Name   | Sequence (5'→ 3')               | Product size        |
| 5'-RACE                                         | 3'-GSP1       | GGAGTCTTCCAATCAGAGCAG           | 250 bp              |
|                                                 | 3'-GSP2       | GAACAAGATGCAAGCTCTAACTG         |                     |
| Fragment 1                                      | 197-F         | GGCACTTGTGCCGTTTACTC            | 1,530bp             |
|                                                 | 1627-R        | CACCACCTGACAACACTTTGAG          |                     |
| Fragment 2                                      | 1524-F        | GCCACGAGGTATGTCAATCAC           | 1,554bp             |
|                                                 | 3078-R        | CAACCACCAATCATCAGGGA            |                     |
| Fragment 3                                      | 2991-F        | CGGTGATGATTGGTTGCTTGA           | 494bp               |
|                                                 | 3485-R        | GATAAGTAACCGCCACGAAGG           |                     |
| Fragment Defective                              | FsHV1-DVF     | GCACAATGGATGACACGAAGA           | 2,580bp             |
|                                                 | FsHV1-DVR     | GTAACCTGATTGAGACCTTCCG          |                     |
| Fragment 4                                      | 5726-F        | GTGAACCTAGTGCCAGTGCTTC          | 1,498bp             |
|                                                 | 7224-R        | AGCACTACCACTCACCCAACC           |                     |
| Fragment 5                                      | 7102-F        | CATACTTGGAGGATTGGTGCA           | 1,611bp             |
|                                                 | 8713-R        | CGGAGATATTCTTGAGCCATG           |                     |
| Fragment 6                                      | 8564-F        | CGAAAGACTCAATGATAACTGTGG        | 1,439bp             |
|                                                 | 10003-R       | AGTCGTATTCTGGCTCGGTTA           |                     |
| Fragment 7                                      | 9905-F        | CAAGCGGTAATGGCAAGAA             | 1,569bp             |
|                                                 | 11474-R       | CTTTCTTGAATAGCCTGGGACA          |                     |
| Fragment 8                                      | 11370-F       | CACTTACAACATGTGGACCGA           | 1,510bp             |
|                                                 | 12880-R       | CGGCAGATTCTGGTTGATACAC          |                     |
| Fragment 9                                      | 12486-F       | TGCGTTCATGTTGGCTTGG             | 1,373bp             |
|                                                 | 13859-R       | CATTCCTGGTGGCGTTGATAA           |                     |
| 3'-RACE                                         | 5'-GSP1       | GCAGCCTAATAAGGTTCTCCGTGAA<br>TG | 450bp               |
|                                                 | 5'-GSP2       | GCAAAGCCCACGGGAGGAAATCCC<br>AC  |                     |
| FsHV1 detection primer                          |               |                                 |                     |
| RdRp                                            | FsHV1-RdRpF1  | GCTCAAGGTGCTGATGGTGTT           | 1,733bp             |
|                                                 | FsHV1-RdRpR1  | AGCGACATTGTAAGCGTGACC           |                     |
| Defective                                       | FsHV1-DefectF | GCACAATGGATGACACGAAGA           | 2,500bp or<br>800bp |
|                                                 | FsHV1-DefectR | GTAACCTGATTGAGACCTTCCG          |                     |
| Absolute quantitative primers                   |               |                                 |                     |
| FsHV1-Defective                                 | FsHV1-qDF     | CGGTTCTGCTTACGCTTTTG            | 123bp               |
|                                                 | FsHV1-qDR     | AAGCAGGTTGATGCTCCAAT            |                     |
| FsHV1-RdRp                                      | FsHV1-RqF     | CAGATGCAACGGCATTTCGAC           | 102bp               |
|                                                 | FsHV1-RqR     | TGCCATTACCGCTTGGATGA            |                     |

| translation elongation factor 1-alpha (TEF-1 $\alpha$ ) |      |                             |         |
|---------------------------------------------------------|------|-----------------------------|---------|
| EF- $\alpha$                                            | EF1  | ATGGGTAAGGARGACAAGAC        | 650 bp  |
|                                                         | EF2  | GGAAGTACCAGTSATCATGTT       |         |
| DNA-directed RNA polymerase II largest subunit          |      |                             |         |
| RPB1                                                    | Fa   | CAYAARGARTCYATGATGGGWC      | 1,600bp |
|                                                         | G2R  | GTCATYTG DGT DGC DGGYTC DCC |         |
| DNA-directed RNA polymerase II second largest subunit   |      |                             |         |
| RPB2                                                    | 5f2  | GGGGWGAYCAGAAGAAGGC         | 1,800bp |
|                                                         | 7cr  | CCCATRGCTTG YTT R C C C A T |         |
|                                                         | 7cf  | ATGGGYAARCAAGCYATGGG        |         |
|                                                         | 11ar | GCRTGGATCTTRTCRTCSACC       |         |

**Supplementary Table S4.** FsHV1-infected strains used in this study.

| <i>Fusarium</i><br>species | Strain | Sample source                    | Location             | Year of<br>collection |
|----------------------------|--------|----------------------------------|----------------------|-----------------------|
| <i>F. sacchari</i>         | FZ06   | Sugarcane diseased<br>leaves     | Fuzhou, Fujian       | 2012                  |
| <i>F. sacchari</i>         | FS65   | Sugarcane diseased<br>leaves     | Fusui, Guangxi       | 2019                  |
| <i>F. sacchari</i>         | FS66   | Sugarcane diseased<br>leaves     | Fusui, Guangxi       | 2019                  |
| <i>F. sacchari</i>         | FS9    | Sugarcane diseased<br>leaves     | Fusui, Guangxi       | 2019                  |
| <i>F. sacchari</i>         | FS18   | Sugarcane diseased<br>leaves     | Fusui, Guangxi       | 2019                  |
| <i>F. sacchari</i>         | FS1    | Sugarcane diseased<br>leaves     | Fusui, Guangxi       | 2017                  |
| <i>F. sacchari</i>         | FSA1   | Sugarcane diseased<br>leaves     | Fusui, Guangxi       | 2019                  |
| <i>F. sacchari</i>         | LZ14   | Sugarcane diseased<br>leaves     | Longzhou,<br>Guangxi | 2020                  |
| <i>F. sacchari</i>         | LZ8    | Sugarcane diseased<br>leaves     | Longzhou,<br>Guangxi | 2020                  |
| <i>F. andiyazi</i>         | FS3    | Sugarcane diseased<br>leaves     | Fusui, Guangxi       | 2017                  |
| <i>F. andiyazi</i>         | LZ12   | Sugarcane diseased<br>leaves     | Longzhou,<br>Guangxi | 2020                  |
| <i>F. solani</i>           | LZ1    | Rhizosphere soil of<br>sugarcane | Longzhou,<br>Guangxi | 2020                  |

**Supplementary Table S5.** The efficiency of horizontal transmission of FsHV1.

| <b>Virus</b>      | <b>Species of the donor strain</b> | <b>Species of the recipient strains</b> | <b>Successful transmission/Total number</b> |
|-------------------|------------------------------------|-----------------------------------------|---------------------------------------------|
| <b>FsHV1-FZ06</b> | <i>F. sacchari</i>                 | <i>F. sacchari</i>                      | 18/30                                       |
| <b>FsHV1-FS1</b>  | <i>F. sacchari</i>                 | <i>F. sacchari</i>                      | 9/30                                        |
| <b>FsHV1-FS9</b>  | <i>F. sacchari</i>                 | <i>F. sacchari</i>                      | 10/30                                       |
| <b>FsHV1-FS65</b> | <i>F. sacchari</i>                 | <i>F. sacchari</i>                      | 8/30                                        |
| <b>FsHV1-FS66</b> | <i>F. sacchari</i>                 | <i>F. sacchari</i>                      | 4/30                                        |
| <b>FsHV1-LZ8</b>  | <i>F. sacchari</i>                 | <i>F. sacchari</i>                      | 5/30                                        |
| <b>FsHV1-FSA1</b> | <i>F. sacchari</i>                 | <i>F. sacchari</i>                      | 8/30                                        |
| <b>FsHV1-LZ14</b> | <i>F. sacchari</i>                 | <i>F. sacchari</i>                      | 8/30                                        |
| <b>FsHV1-FS18</b> | <i>F. sacchari</i>                 | <i>F. sacchari</i>                      | 9/30                                        |
| <b>FsHV1-FS3</b>  | <i>F. andiyazi</i>                 | <i>F. sacchari</i>                      | 11/30                                       |
| <b>FsHV1-LZ12</b> | <i>F. andiyazi</i>                 | <i>F. sacchari</i>                      | 4/30                                        |
| <b>FsHV1-LZ1</b>  | <i>F. solani</i>                   | <i>F. sacchari</i>                      | 3/30                                        |

**Supplementary Table S6.** Amino acid variation between FsHV1-A1 and the other 11 FsHV1 isolates

| <b>Number</b> | <b>Position</b> | <b>Amino acids of FsHV1-A1</b> | <b>Amino acids of other 11 FsHV1 isolates</b> |
|---------------|-----------------|--------------------------------|-----------------------------------------------|
| <b>1</b>      | 259             | G                              | E                                             |
| <b>2</b>      | 438             | S                              | N                                             |
| <b>3</b>      | 494             | F                              | I                                             |
| <b>4</b>      | 708             | C                              | H or Y or R                                   |
| <b>5</b>      | 740             | G                              | E                                             |
| <b>6</b>      | 1708            | G                              | D                                             |
| <b>7</b>      | 1874            | L                              | P                                             |
| <b>8</b>      | 1934            | P                              | S                                             |
| <b>9</b>      | 2093            | I                              | V                                             |
| <b>10</b>     | 2792            | G                              | V                                             |
| <b>11</b>     | 2815            | F                              | I                                             |
| <b>12</b>     | 2859            | S                              | R                                             |
| <b>13</b>     | 2890            | T                              | N                                             |
| <b>14</b>     | 3155            | N                              | K                                             |
| <b>15</b>     | 3453            | R                              | Q                                             |
| <b>16</b>     | 3193            | G                              | D                                             |
| <b>17</b>     | 4202            | I                              | V                                             |
